# Supplementary material for: Development of ternary iron vanadium oxide semiconductors for applications in photoelectrochemical water oxidation
Source: Royal Society of Chemistry journal article supplement (doi:10.1039/c5ra22586h), 2015-12-23
Supplement: c5ra22586h1.pdf [file c5ra22586h1.pdf]

**Supporting Information:**

**Development of ternary iron vanadium oxide semiconductors for  
their applications in Photoelectrochemical Water Oxidation**

Harahari Mandal<sup>a</sup>, Sanjib Shyamal<sup>a</sup>, Paramita Hajra<sup>a</sup>, Aparajita Bera<sup>a</sup>, Debasis

Sariket<sup>a</sup>, Sukumar Kundu<sup>b</sup>, Chinmoy Bhattacharya<sup>a\*</sup>

<sup>a</sup> *Department of Chemistry*, <sup>b</sup> *Department of Metallurgy & Materials Engineering*

*Indian Institute of Engineering Science & Technology, (IEST), Shibpur,*

*Howrah – 711103, West Bengal, INDIA*

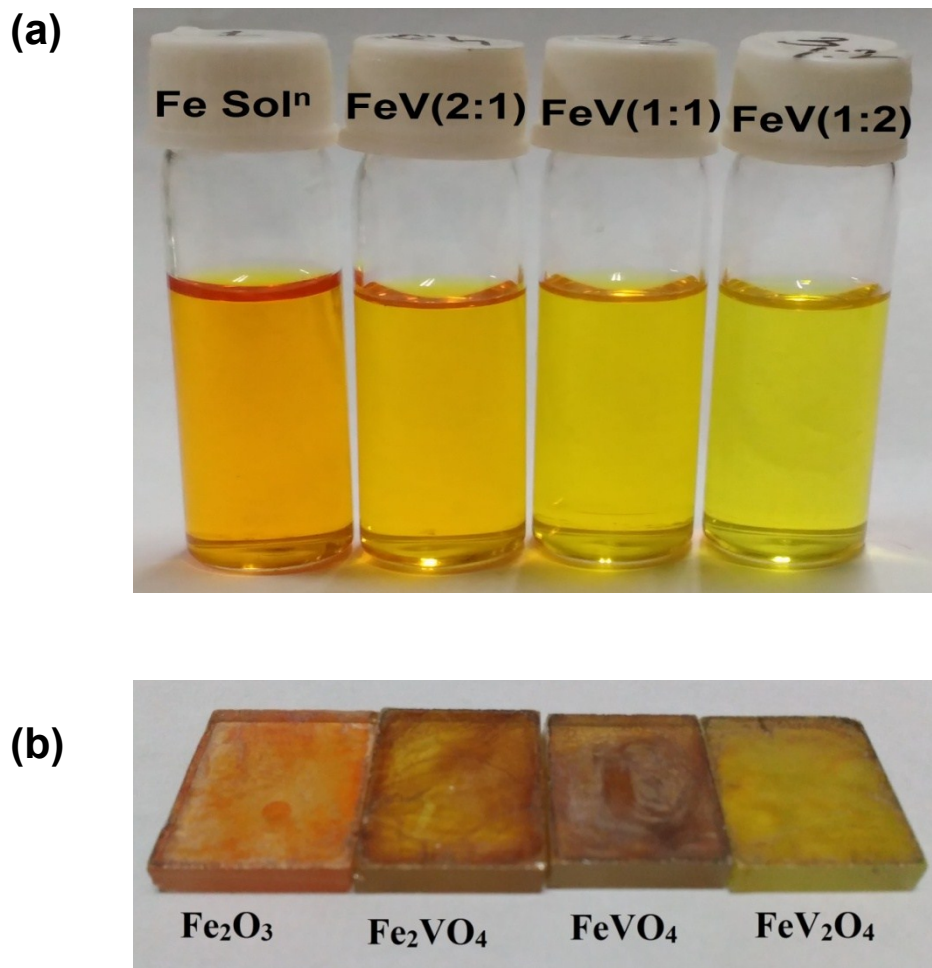

**Fig. S1:** Photograph of the individual (a) precursor solution and (b) Semiconductor thin films developed on ITO coated glass substrates.

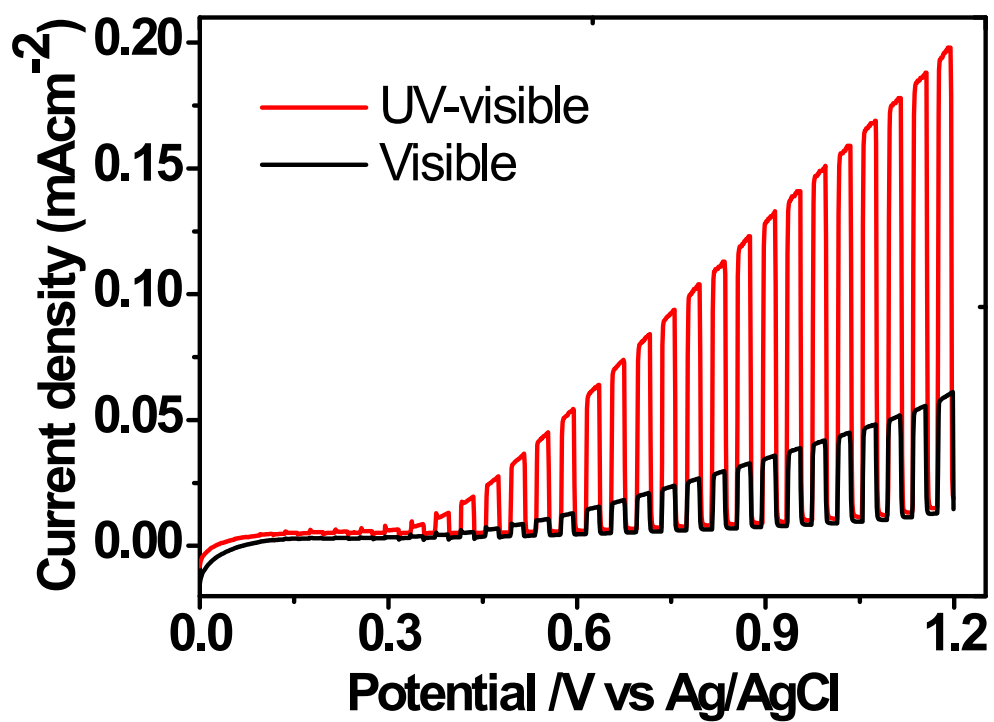

**Fig. S2:** LSV plot of FeV<sub>2</sub>O<sub>4</sub> semiconductor electrode under periodic UV-vis and visible (using a 420nm cut-off filter) light measured in 0.1M SO<sub>4</sub><sup>2-</sup> - PBS (pH 7).

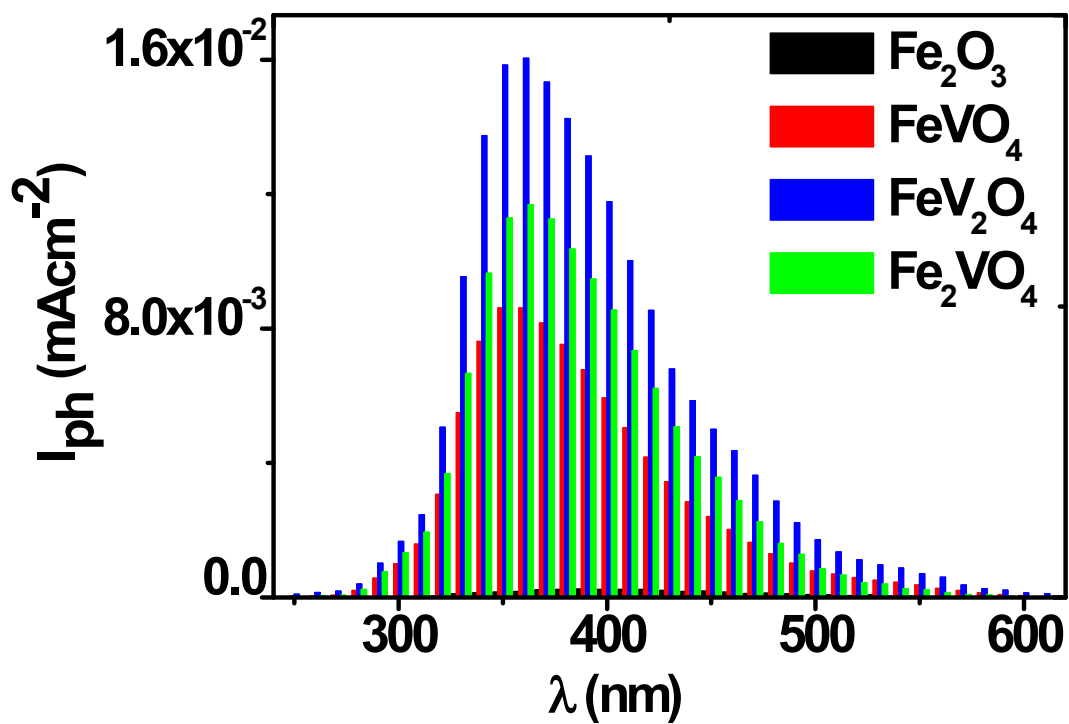

**Fig. S3:** Electrochemical Action spectrum of Fe-V-Oxide semiconductors film as calculated from the photocurrent spectra of the material.

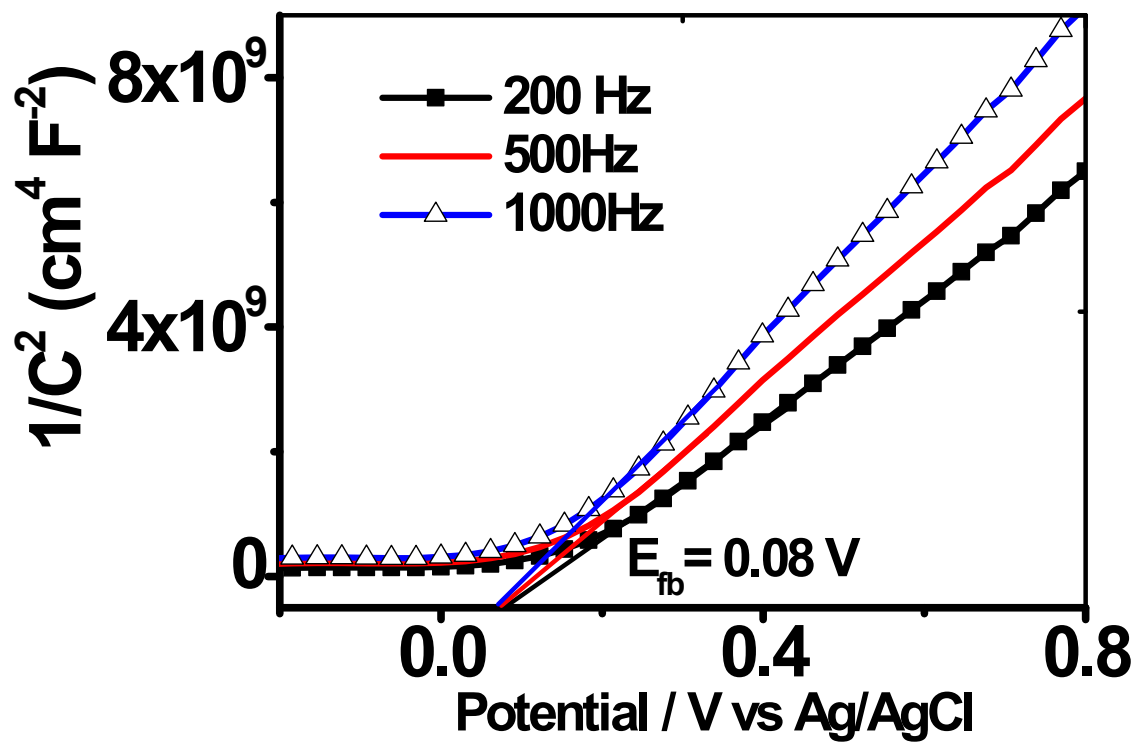

**Fig. S4:** Mott-Schottky plots of  $\text{FeV}_2\text{O}_4$  film in 0.1 M  $\text{Na}_2\text{SO}_4$  with PBS solution.

Plots were recorded at 200 Hz, 500 Hz, and 1000 Hz with an ac amplitude of 10 mV.

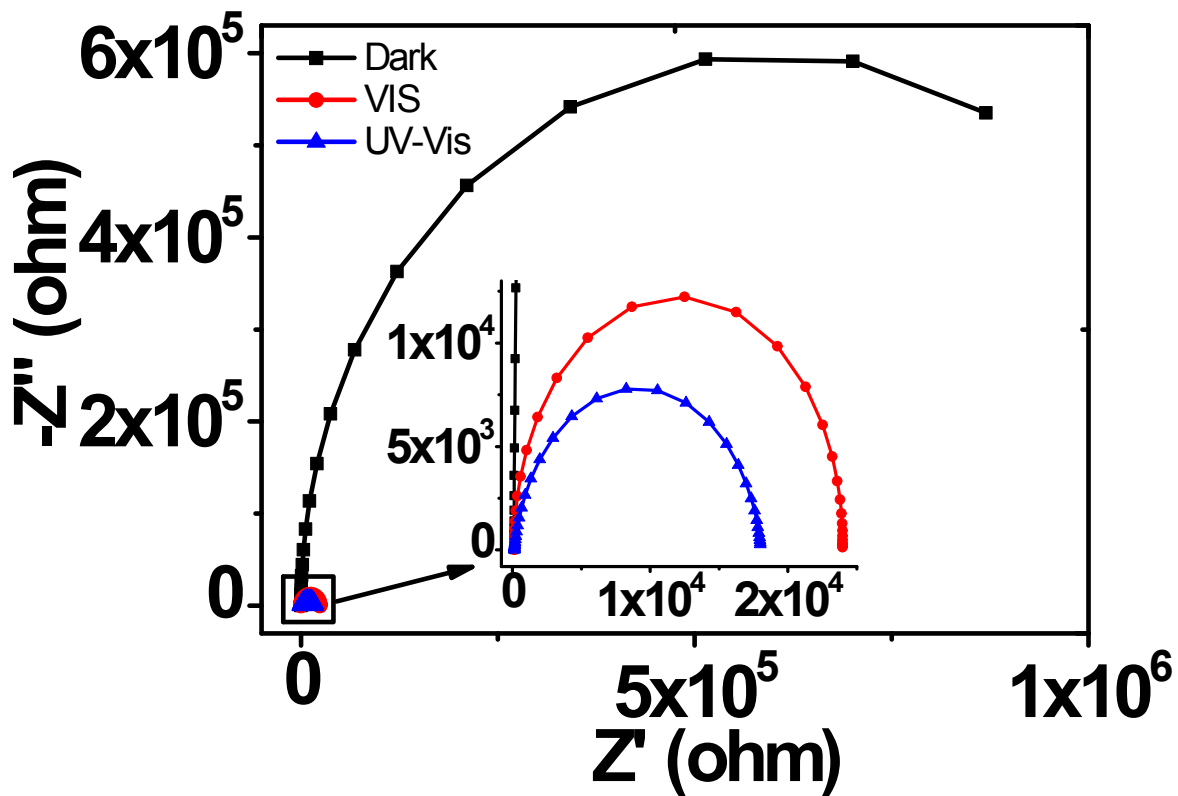

**Fig. S5:** Nyquist plot of  $\text{FeV}_2\text{O}_4$  film in  $0.1 \text{ M Na}_2\text{SO}_4$  with PBS solutions under dark, visible and UV-Vis light illumination.
